# Supplementary material
Source: PubMed Central journal article supplement (PMC2789672)
Supplement: 00095.2009_1.pdf [file 00095.2009_1.pdf]

1 Supplementary Table 1. Primer sequences used for RT-PCR and Quantitative RT-PCR

| Gene          | RT-PCR primers (Forward/ Reverse)           | Quantitative RT-PCR primers (Forward/ Reverse) |
|---------------|---------------------------------------------|------------------------------------------------|
| <i>acc</i>    | AGGAATCGGTCACCAAGATG/ ACCATTCCGACGTTGTTTTTC | ATTCGGATTCCGGAGAAGAT/ ACCATTCCGACGTTGTTTTTC    |
| <i>fas-1</i>  | TCCTACAGCAGCCAAGTCCT/ AGACCGGCACTGTCAGAGTT  | ATTTTCGTTGGCATGAGTTCC/ CTCAAGGCTTTGGAGAGTGG    |
| <i>fas-2</i>  | GGTGTTCCTCAGCGTATCGT/ GGACAATGTTTCGCAGATCCT | CGATATGGCGGAGGATAAGA/ GTCGCACGACATCAGTCTGT     |
| <i>fas-3</i>  | GGAATGGCCAACTCTGTGAT/ AACATTGCTACTCCGGTTGG  | GACATGGAAATCGGTGGAAC/ GGATCCGGAGTAGTCAGCAG     |
| <i>acs</i>    | GTACCCCGACCATGTACGTC/ TTCATCCGGAACCGCTATAC  | TCCGAAGAAGACGAAGGAAA/ CTTGATCCGTCCAACGATCT     |
| <i>cpt-1</i>  | GTCACGGTCGATCAGTTCAA/ TCCATAGCCGTCCATACACA  | TCCCTTCCTAGCTTCGTTCA/ ATCGAGGCTATGGGGAGTTC     |
| <i>cpt-2</i>  | TTACACCGAAAACCGTGACA/ TCCGTGCTGTTTGTAGAACG  | TGTCTCTGCCTGGATGACAG/ GCGAGAAGGACTTGTGCAAC     |
| <i>cpt-3</i>  | TGTTTGTGCTGTCGTTGGAT/ GATCCAGTTCTTGCCGTAGC  | TCAACGGACTGACGTACGAG/ GTCGGATCCTTTTGTGGTGT     |
| <i>acd-1</i>  | GTCATCAACGGGCAGAAGAT/ ACCTTGTTGGCCATATCAGC  | GCCCATGGCAATCTTAAATC/ ATACGCGTGGAATCACCTTC     |
| <i>acd-2</i>  | AGGGTACCAACGACATCCTG/ TTGATCTTGCGGATGTTGAC  | CATCGTCGAGGAGCAGTACA/ CAGGTCCTGTTTGACGGAAC     |
| <i>acd-3</i>  | ACGATGTGAAGACCCGGTAG/ CGAATGTCACGGAGGATTTT  | GTAGTCCTTGGCACCGTTGT/ AGTTTGGCAACGTTTCAGGAG    |
| <i>acd-4</i>  | AGCACAAGCTCGGAATCTGT/ CGATACACTTGACGGTGGTG  | AGGTTCCCTTCCTCAAGCAG/ CGATACACTTGACGGTGGTG     |
| <i>acd-5</i>  | CAGCAAGTTCTGGATCACCA/ GTTTCCACCGAGAATCTGGA  | AACTGGACAAGTTGGGCATC/ TACACGCCCTTGTTGAGTTG     |
| <i>hcdh-1</i> | GGAACGTGTCGCTAAGAAGC/ ATGTTGTTTCGTCGTGTCCAA | GATCGATAGCGACGAGGTGT/ CGAACTGTTTCAGCAAAAATCG   |
| <i>hcdh-2</i> | TTTTTCGTGAGCAAACTTCG/ GCCTGTGCTTCCTGCATAAT  | ACGCCAGTTTGAAGGACATC/ CATGTCCATCAGCTCAAACG     |
| <i>hcdh-3</i> | CCCGGTAGACAAGATGCAAT/ CAACGCGTACTTCTGGTTCA  | ACACGACCCGTATTCTGTCC/ CCGAACGATTTGGTCATCTT     |
| <i>hcdh-4</i> | GGCCTCTACCTAGGCCTGAC/ AGAACCGATCAACTGCTGCT  | AAATCAACGCGTGCTTCAG/ TGGAGAGTGGGGACATTTTC      |

|               |                                             |                                              |
|---------------|---------------------------------------------|----------------------------------------------|
| <i>ech-1</i>  | AGGCGTTCGAGTTCATCAAG/ TGATCATGTTTCCGGTGAGA  | GCGTCCAGTTGTTTCAGGAAG/ GAGCCGACATCAAGGAGATG  |
| <i>ech-2</i>  | ACTACACGATCGGGCTGAAC/ TGCAGACTTTGCCTTCAATG  | GTTGGTCTGGTTGACGAGGT/ GCCTGTTTGGTCATCGATCT   |
| <i>ech-3</i>  | GGTTCGATGCTTTGTCCTGT/ AATCACCGATCGACTCTTGG  | AGCGAGTTTTCGGGATTTTCT/ GGCAGTCCGGTAAACAACAT  |
| <i>ech-4</i>  | GGCCAACACCTCGTACAACT/ ATGTCCACCTCCTTCACCTG  | CTCAAACAGCCTCGCCTTAC/ GGGATTGACTTGCTGGACAT   |
| <i>bk-1</i>   | TCCCTCGTGATAAGGTGGAC/ TGAATGCAGGCAAGAGTTTG  | GTAACGCAGCCGTTCTTCTT/ AAGGGCAAGGAGGTTGACTT   |
| <i>bk-2</i>   | AATTCTCCTCCGGTGAAACC/ CTCCCATGAGTCGATGTCCT  | CCAGGACAAGGGCTACTTCA/ GTCCTTGTCGACGGTTTTTGT  |
| <i>fabp</i>   | GTCAAGGAGGGCGATGAGTA/ CGGTAAACTCCCGGATGAT   | TCGTGCACCAGCTTGTTATC/ CGAGGAGTTCGATGAGGAAA   |
| <i>lipase</i> | TGAGAACCGTGGTACGATGA/ CATCGGATTTCTCTGCCTTC  | TCACCTGTTTCCGGATTCTC/ GAGACAGCGTCCGTAGAAGC   |
| <i>fad-1</i>  | GTCCGGTCAGAACACCTTGT/ AGGTGGAAACGTTGACCTTG  | AGGGCTGGCACAACACTATCAC/ AGGTGGAAACGTTGACCTTG |
| <i>fad-2</i>  | CGATCCGTACTACAGCGACA/ TAGCTTCCAAACTCGCCACT  | TCAAACGGCAACAGGTAGTG/ ACTTTGTGTGGGGACTCGAC   |
| <i>fad-3</i>  | TCGACATGAGTGACCTGGAG/ ATTCAGCGTTGTGTGAATCG  | TCGTCATGTGGCAGAAAAAG/ CCAAATGTTTTTCGGACCAGT  |
| <i>nhr-41</i> | CATGAAGACGCTGATCCTGA/ ATGTACGTCAGCACGCTCTC  | CTGCAGGACAACGTCAAGAA/ ATACTCGCGGAAGCTGGTAA   |
| <i>nhr-48</i> | ACTCTGTTCCGTCGTCGTCT/ CCTTCGTCTTCATCGTCGTC  | CAGTTCATGTCCTCCCAAC/ GGGTTGGTTCATGAGCTGTT    |
| <i>nhr-49</i> | GTTCCAGTTTAGAGGAAGTTGA/CGGATCGAAAAATACCAATG | AGTCATCAAATGGGCTTTTCG/ TCATTTGCGTCGTCTAGTGC  |
| <i>28s</i>    | N/A                                         | AGATATTCACCTGCGGTTGG/ GTAATGGATCGCAACGTCCT   |
| <i>rpl19</i>  | CCAGAAGATGCTGTGGATGA/ AAAACCGTGCAGCTTCAAAC  | CGCTTTGTTTGATCGTGTGT/ CCAATCCAGGAGTGCTTTTTG  |

2

3
